# Supplementary material for: Plasmonic enhancement of aqueous processed organic photovoltaics
Source: Royal Society of Chemistry journal article supplement (doi:10.1039/d1ra02328d), 2021-01-01
Supplement: d1ra02328d1.pdf [file d1ra02328d1.pdf]

## Supporting Documents

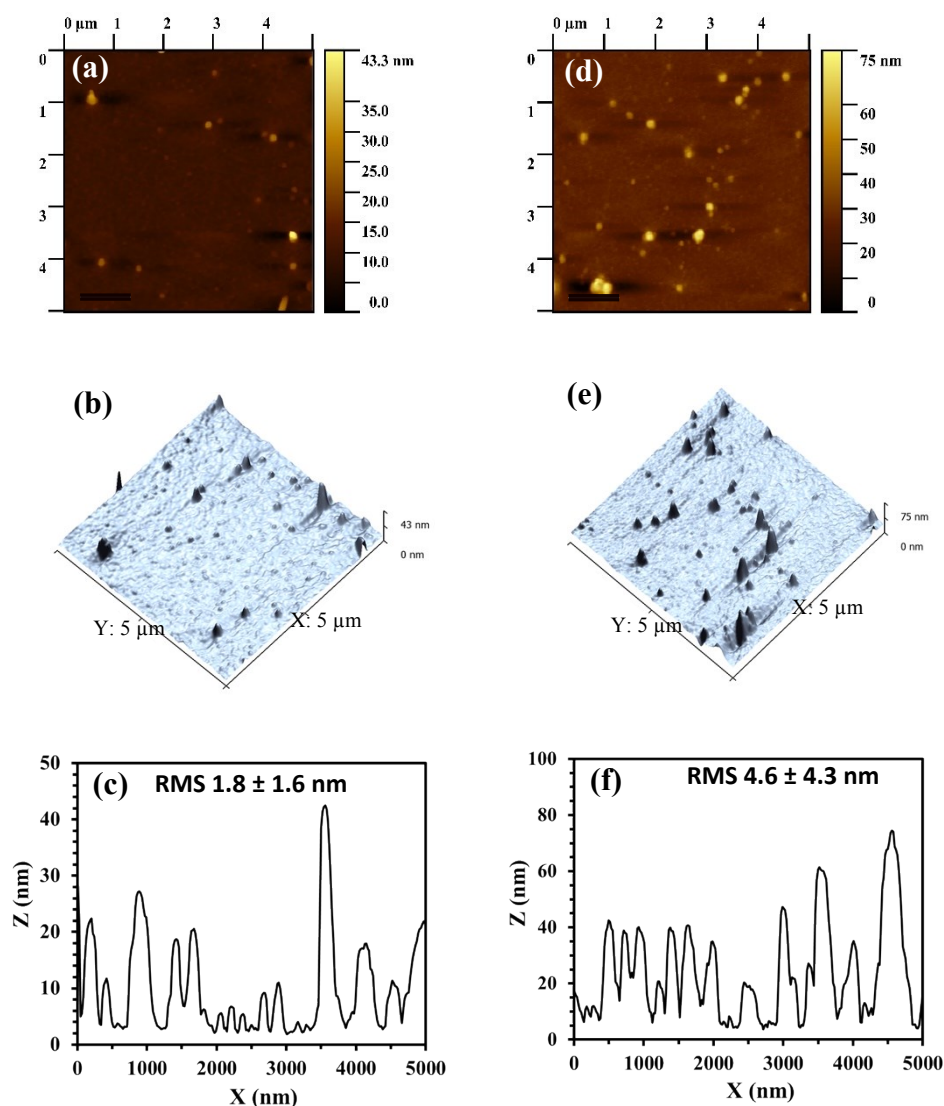

**Figure S1:** The AFM morphology images ( $5\mu\text{m} \times 5\mu\text{m}$ ) of ZnO films with (a) 3.5 mg/ml and (d) 4.5 mg/ml weight concentrations of plasmonic  $\text{Na}_x\text{WO}_3$  nanoparticles. The 3D images of (b) 3.5 mg/ml and (e) 4.5 mg/ml weight concentrations of  $\text{Na}_x\text{WO}_3$  nanoparticles embedded ZnO films showing the surface morphology as well as height of each plasmonic nanoparticle. The calculated height of each plasmonic nanoparticle along with X-axis are presented for (c) 3.5 mg/ml and (d) 4.5 mg/ml weight concentrations of plasmonic  $\text{Na}_x\text{WO}_3$  nanoparticles based ZnO films where the average height of all nanoparticles for corresponding films are  $10 \pm 8.5$  nm and  $24 \pm 17$  nm.
